# Supplementary material for: Polyphenol-stabilized coacervates for enzyme-triggered drug delivery
Source: PubMed Central journal article supplement (PMC11344779; doi:10.1038/s41467-024-51218-8), 2024-08-24
Supplement: 41467_2024_51218_MOESM3_ESM.pdf [file 41467_2024_51218_MOESM3_ESM.pdf]

## **Description of Additional Supplementary Files**

**File Name: Supplementary Movie 1**

**Description:** C1 peptide with heparin, showing no coacervate formation.

**File Name: Supplementary Movie 2**

**Description:** C2 peptide with heparin, forming nano-coacervates.

**File Name: Supplementary Movie 3**

**Description:** C3 peptide with heparin, forming micro-coacervates.
